# Supplementary material for: “Islands of Divergence” in the Atlantic Cod Genome Represent Polymorphic Chromosomal Rearrangements
Source: PubMed Central journal article supplement — Genome Biol Evol. 2016 Mar 15;8(4):1012–22. doi: 10.1093/gbe/evw057 (PMC4860689; doi:10.1093/gbe/evw057), 2016-03-15

Supplementary Fig. S1. **Linkage disequilibrium on Atlantic cod linkage group 2**

SNP pairs showing high composite linkage disequilibrium ( $CLD > 0.5$ ) within sampling sites (Table 1) are indicated on a white ( $CLD = 0.5$ ) to red ( $CLD = 1$ ) scale according to a preliminary linkage map (cM).

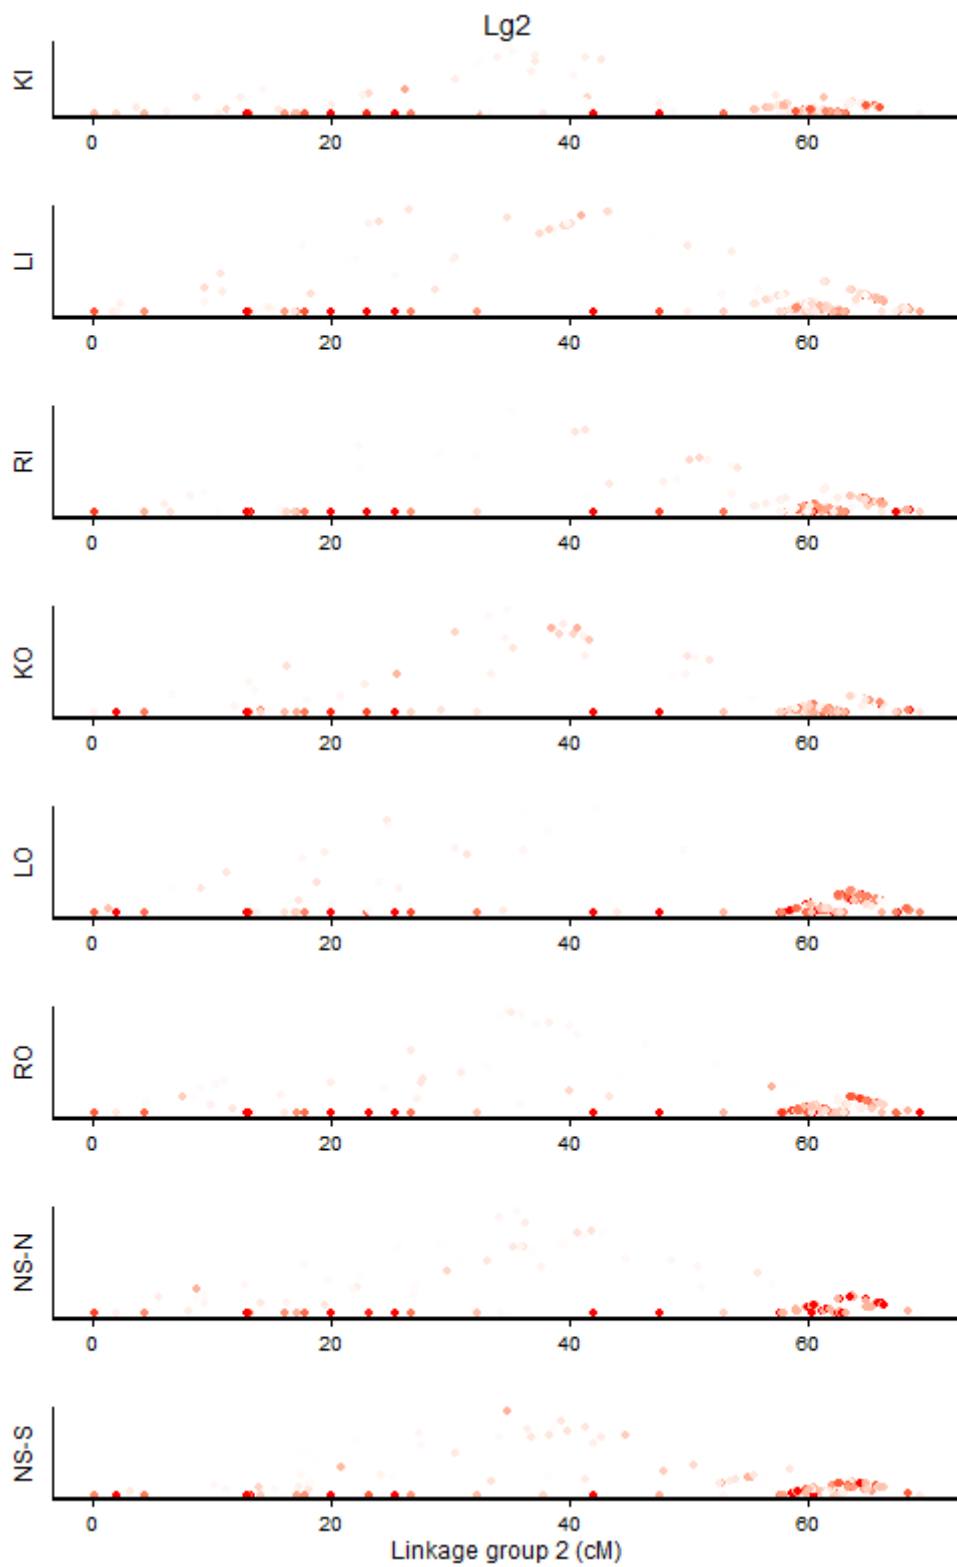

Supplementary Fig. S2. **Linkage disequilibrium on Atlantic cod linkage group 7**

SNP pairs showing high composite linkage disequilibrium ( $CLD > 0.5$ ) within sampling sites (Table 1) are indicated on a white ( $CLD = 0.5$ ) to red ( $CLD = 1$ ) scale according to a preliminary linkage map (cM).

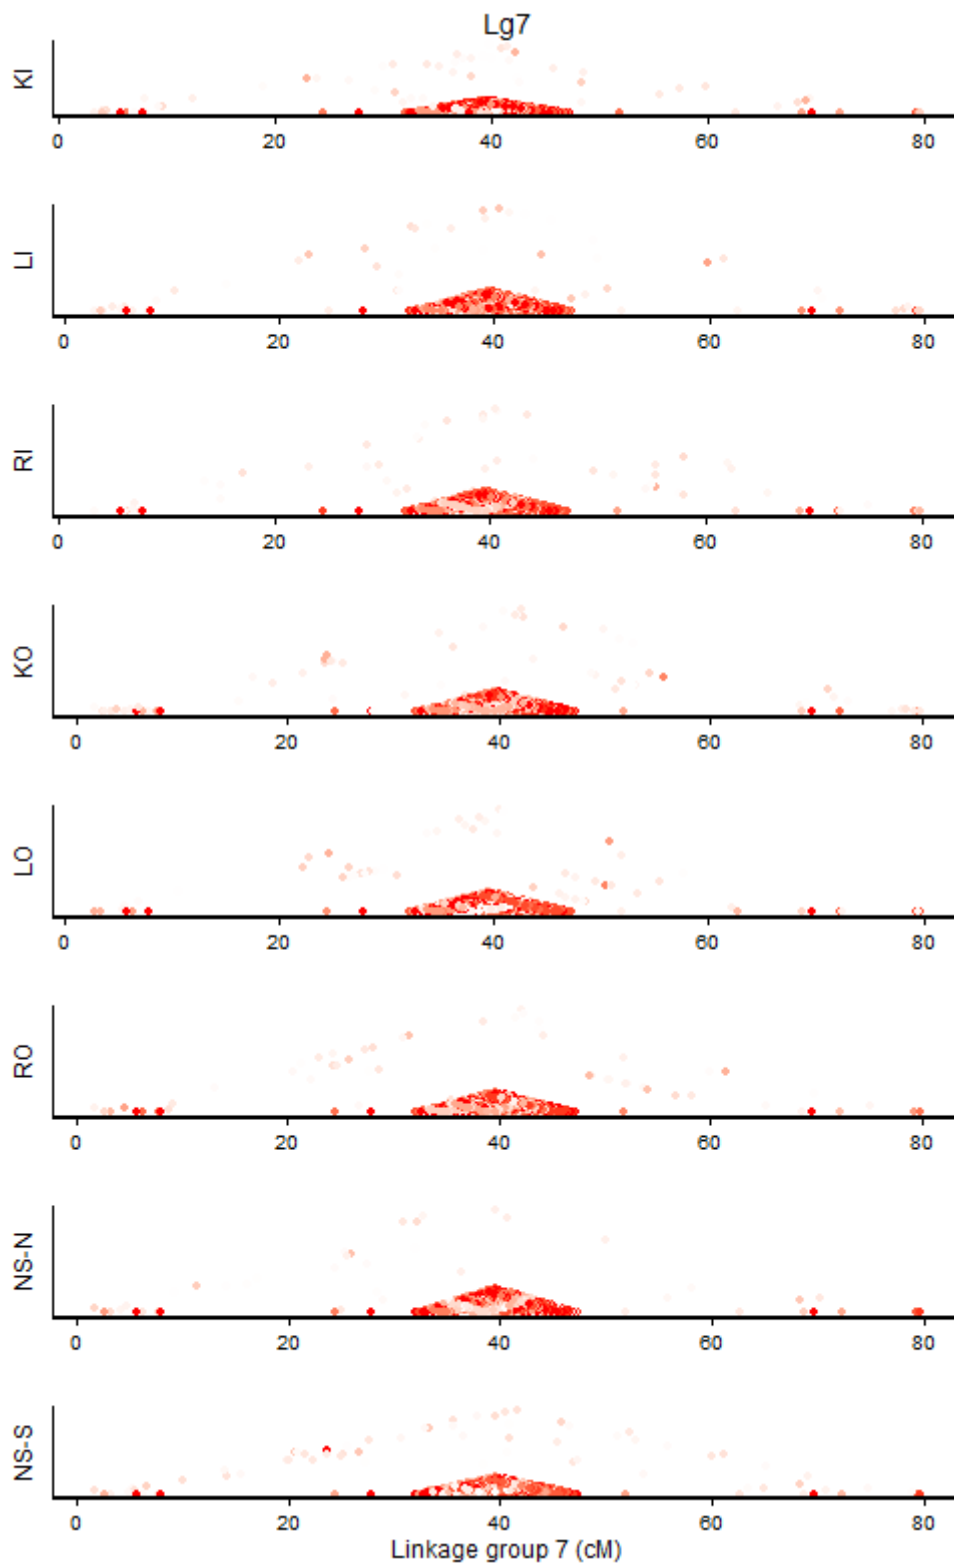

Supplementary Fig. S3. **Linkage disequilibrium on Atlantic cod linkage group 12**  
SNP pairs showing high composite linkage disequilibrium ( $CLD > 0.5$ ) within sampling sites (Table 1) are indicated on a white ( $CLD = 0.5$ ) to red ( $CLD = 1$ ) scale according to a preliminary linkage map (cM).

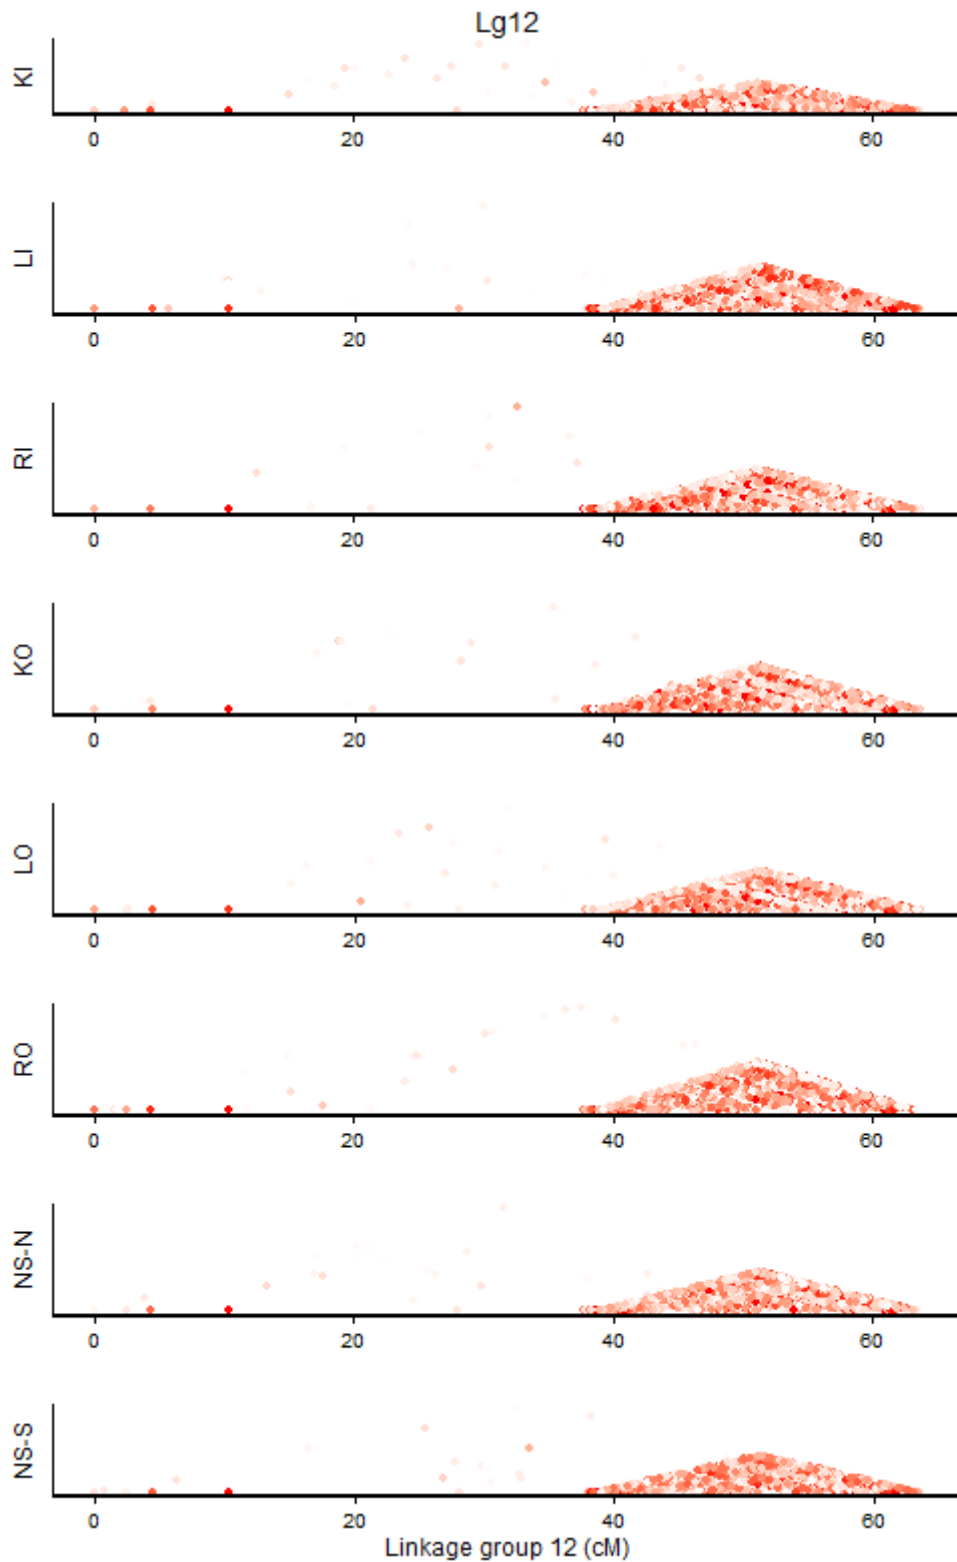

Supplementary Fig. S4 **Probabilistic scan for inverted haplotypes**

Sliding window analyses for inverted haplotypes, for window size of 4cM, are presented for linkage group 2 (top), 7 (middle) and 12 (below).

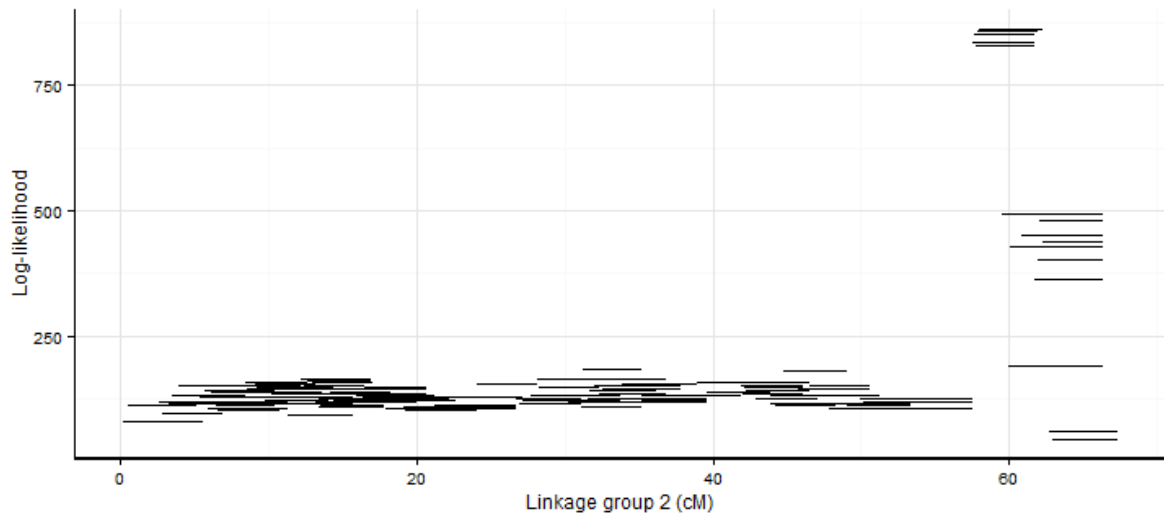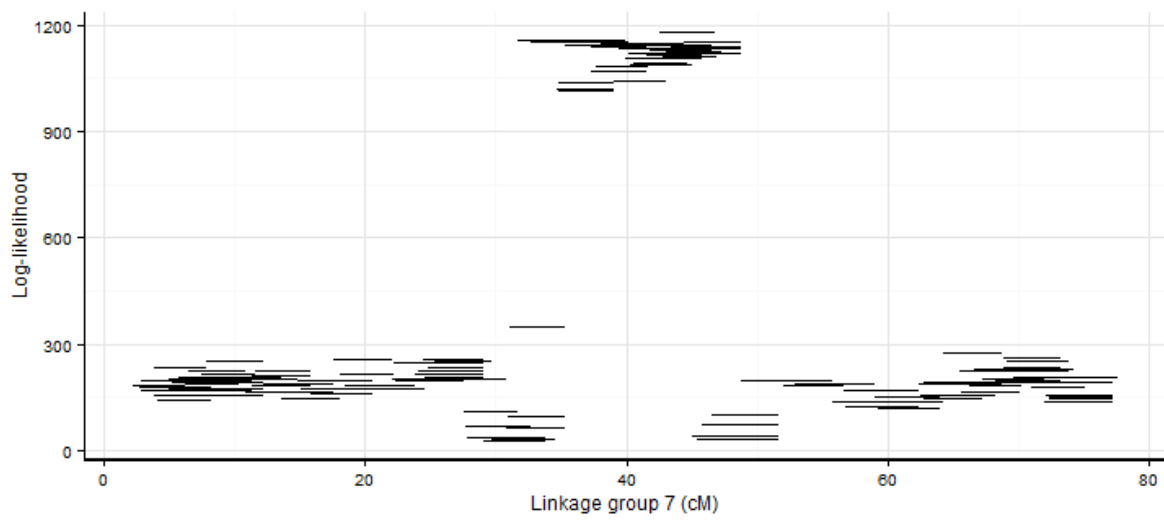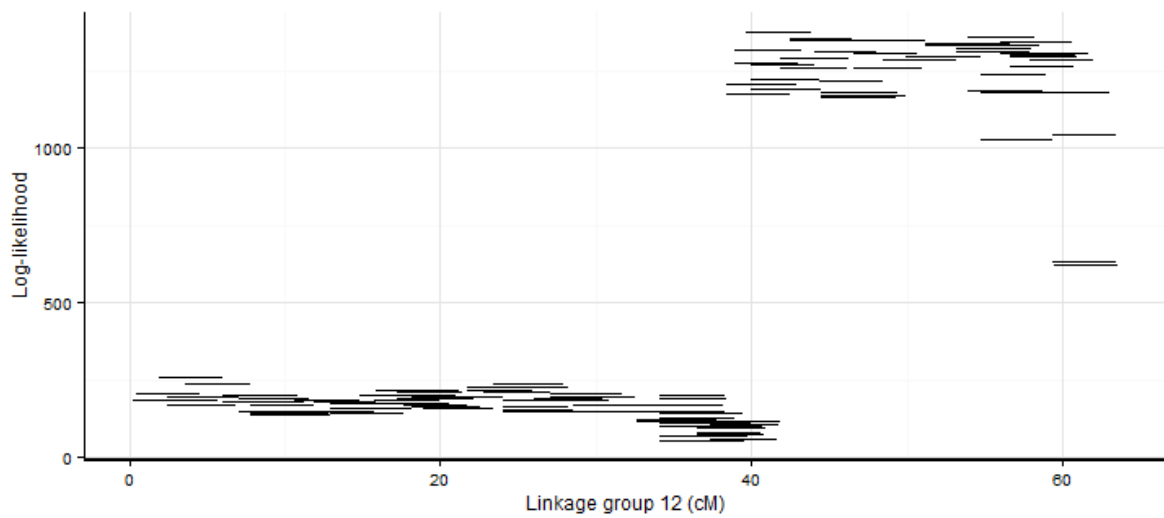

Supplementary Fig. S5 **Identification of inversion genotypes**

Principle component analyses were conducted for identification of inversion genotypes, and principle component 1 (PC1) and 2 (PC2) are presented for the rearranged segments of linkage group 2, 7 and 12.

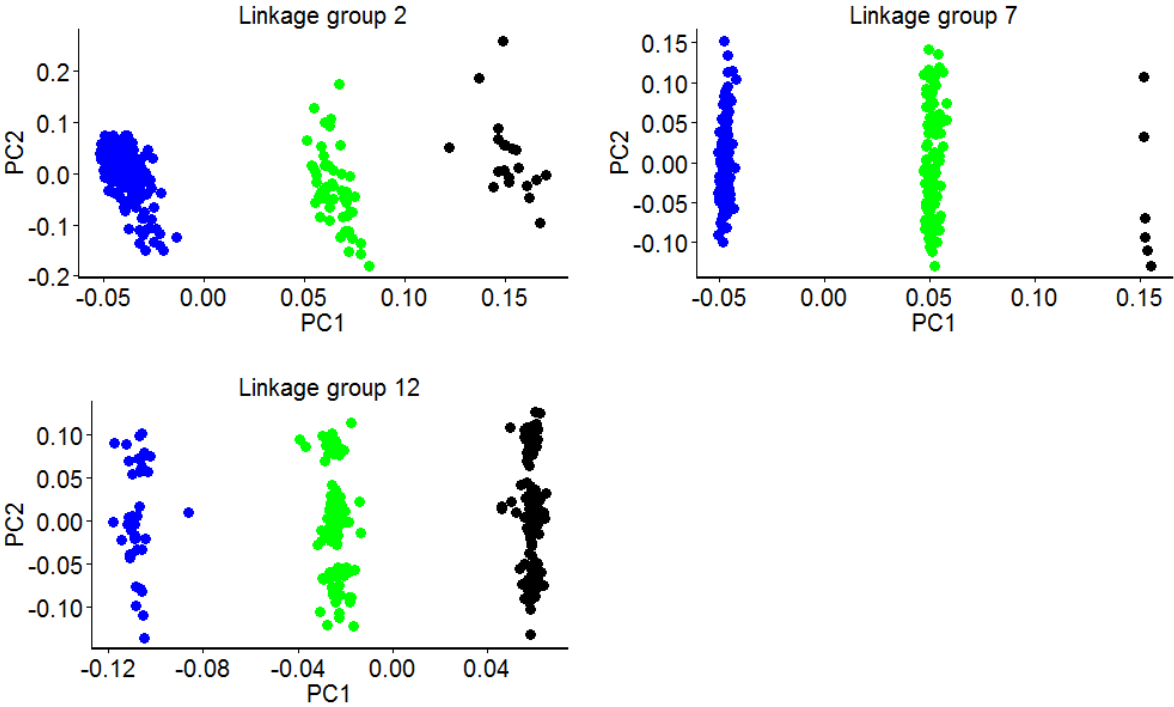

Supplement: supp_evw057_SuppFig.pdf [file supp_evw057_SuppFig.pdf]
